# Supplementary material for: Divergence of Liver Lipidomes in Tibetan and Yorkshire Pigs Living at Different Altitudes
Source: MDPI journal article supplement (doi:10.3390/molecules28072991), 2023-03-27
Supplement: s1 [file s1]

## Supplementary Materials

### Divergence of Liver Lipidomes in Tibetan and Yorkshire Pigs Living at Different Altitudes

A

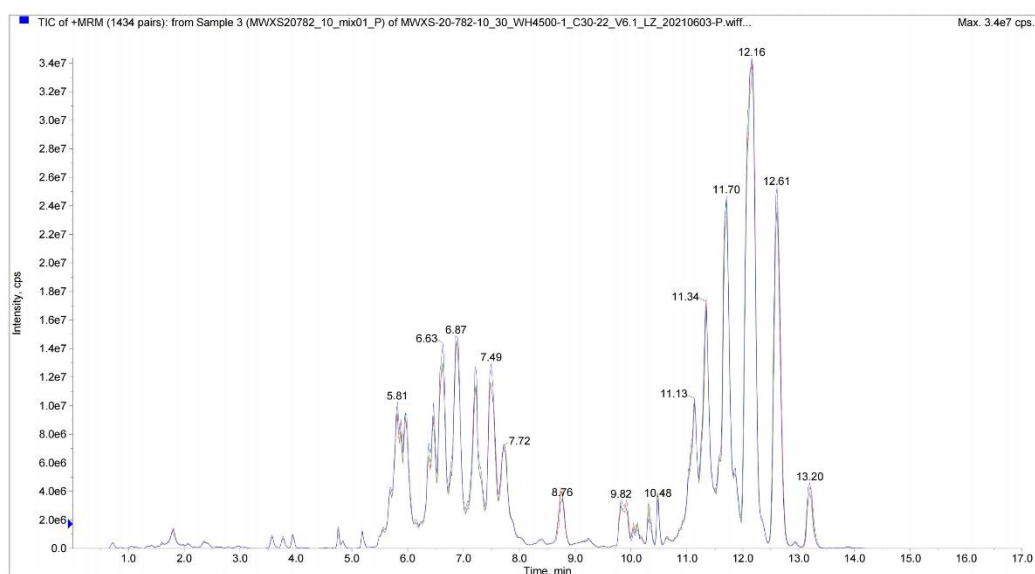

B

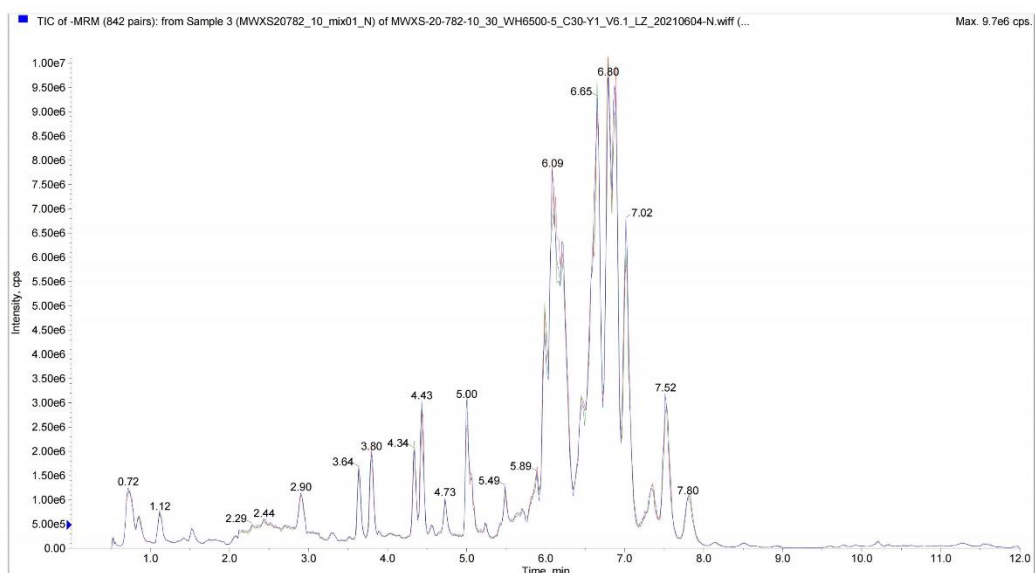

**Figure S1:** Total ion current (TIC) plots for mass spectrometric analysis of the same mass of quality control (QC) samples in positive (A) and negative ion modes (B).

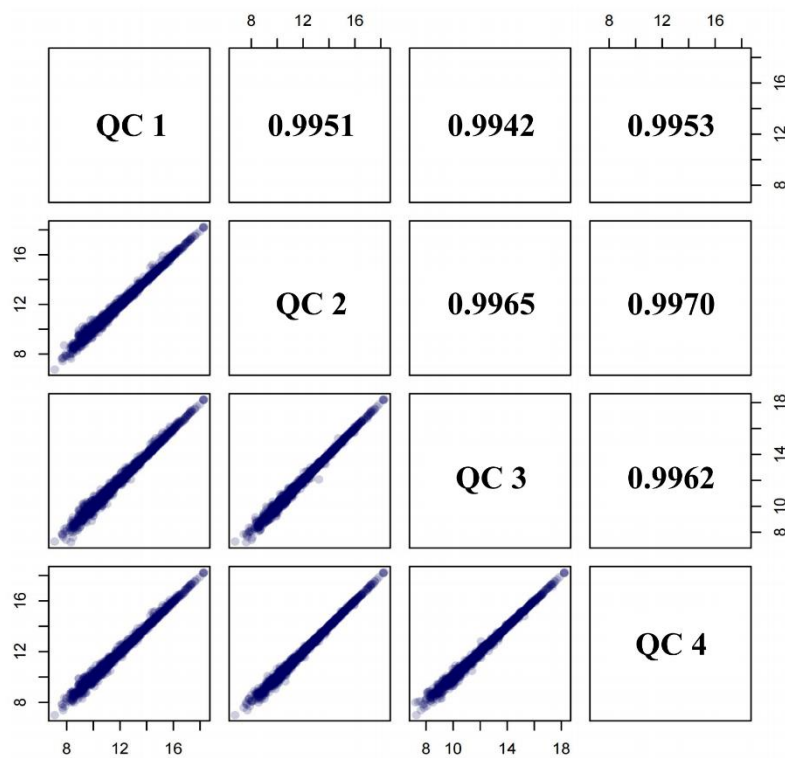

**Figure S2:** Pearson correlation analysis of QC samples.

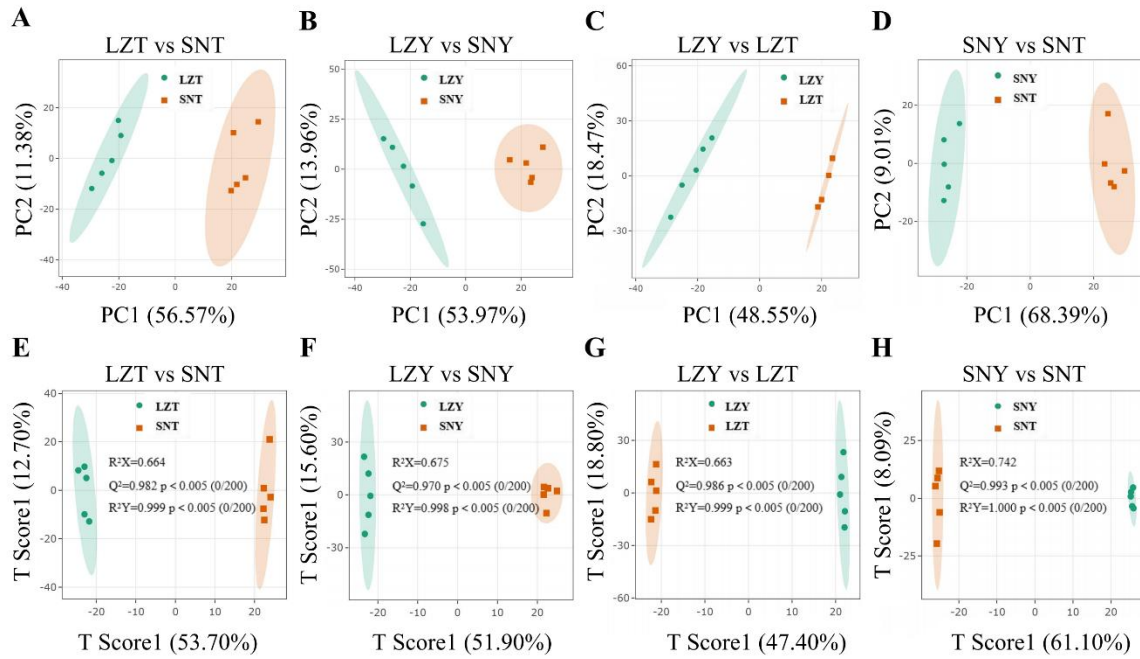

**Figure S3. Principal component analysis (PCA) (A–D) and orthogonal partial least-squares discrimination analysis (OPLS-DA) (E–H) score plots of the liver lipidomes of different pig breeds raised at different altitudes.** LZT, Linzhi (low-altitude, 3000 m) Tibetan pig; SNT, Shannan (high-altitude, 4500 m) Tibetan pig; LZY, Linzhi Yorkshire pig; SNY, Shannan Yorkshire pig,  $R^2X$  and  $R^2Y$  in the figure indicate the explanatory rates of the proposed model for the X and Y matrices, respectively, and  $Q^2$  indicates the predictive power of the model, the corresponding  $p$ -values in parentheses are the frequencies of occurrence of random grouping models that outperformed the predictive power and explanatory rate of the present OPLS-DA model for the Y matrix, respectively, in 200 random permutation experiments.

**Table S1: The internal standards used in this study – provided as a separate document.**

**Table S2: Lipid identification information for all samples – provided as a separate document.**
